# Supplementary material
Source: HighWire-hosted journal article supplement (https://ijgc.bmj.com/content/29/1/147)
Supplement: inline-supplementary-material-2 [file inline-supplementary-material-2.docx]

**Supplementary Table 1.** Pharmacokinetic parameters of total and UF platinum after administration of oxaliplatin

| **Total Platinum in Plasma** | **AUC 0-last (ug/mL *h)** | **Cmax (ug/mL)** | **Clearance (L/h)** | **Vd (L)** | **T 1/2 (h)** |
| --- | --- | --- | --- | --- | --- |
| **Total Platinum** | 48.2 ± 18.1 | 3.90 ± 5.32 | 1.92 ± 0.57 | 109.4 ± 34.4 | 44.6 ± 23.7 |
| **UF Platinum** | 5.77 ± 2.35 | 0.975 ± 1.472 | --- | --- | 24.2 ± 26.4 |
